# Supplementary material for: In-situ-sprayed therapeutic hydrogel for oxygen-actuated Janus regulation of postsurgical tumor recurrence/metastasis and wound healing
Source: PubMed Central journal article supplement (PMC10821930; doi:10.1038/s41467-024-45072-x), 2024-01-27
Supplement: 41467_2024_45072_MOESM3_ESM.pdf [file 41467_2024_45072_MOESM3_ESM.pdf]

## **Description of Additional Supplementary Files**

### **File Name: Supplementary Movie 1**

In situ formation process of the sprayed HIL@Z/P/H hydrogel at the postoperative wound site.
